# Supplementary material for: Global ozone–CO correlations from OMI and AIRS: constraints on tropospheric ozone sources
Source: Copernicus journal article supplement (doi:10.5194/acp-13-9321-2013), 2013-09-17
Supplement: Supplementary file 1 [file acp-13-9321-2013-supplement.pdf]

## Supplementary Material

### GEOS-Chem CO 2008 Seasonal Mean Mixing Ratios

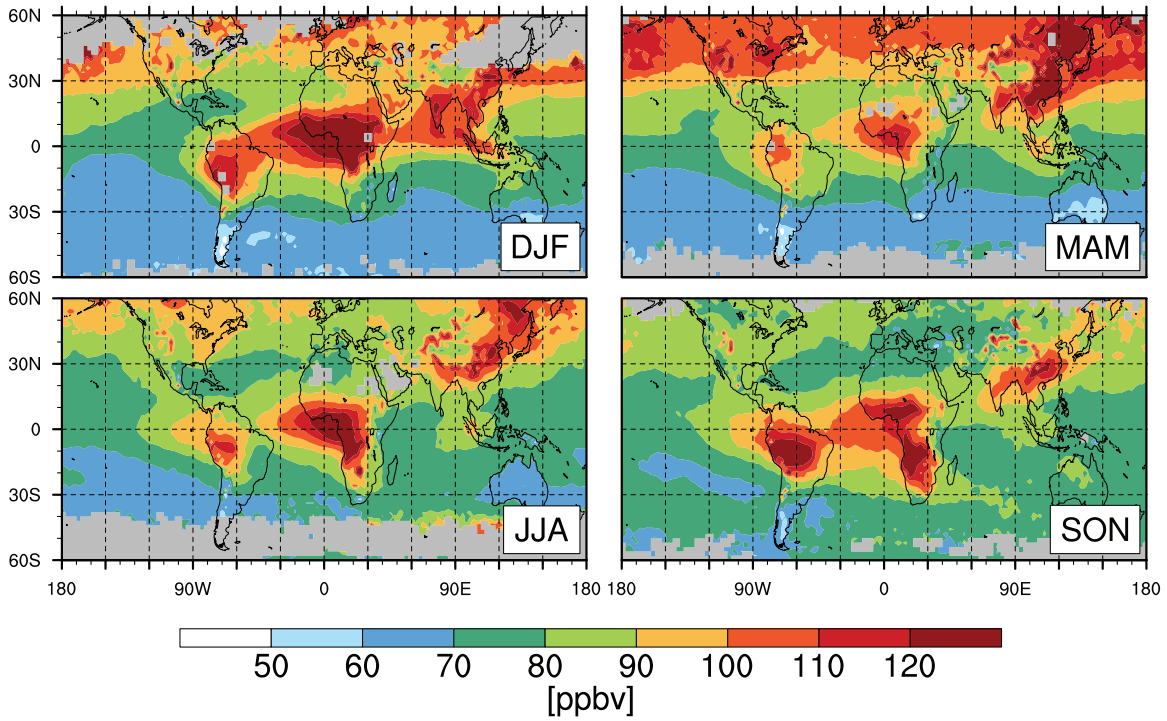

Figure S1a: Seasonal mean GEOS-Chem CO mixing ratios at 700-400 hPa for 2008. Gray indicates insufficient data (see text).

### GEOS-Chem Ozone 2008 Seasonal Mean Mixing Ratios

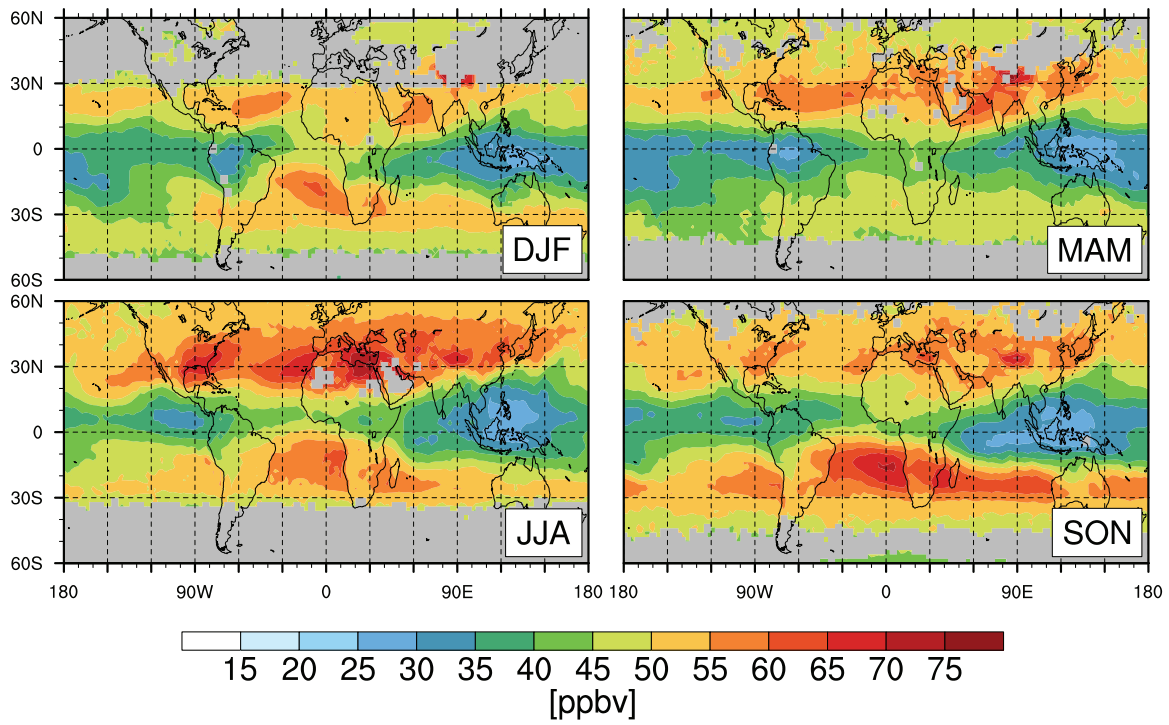

Figure S1b: Same as Figure S1a but for GEOS-Chem ozone mixing ratios at 700-400 hPa.

### Combustion Source Influence 2008

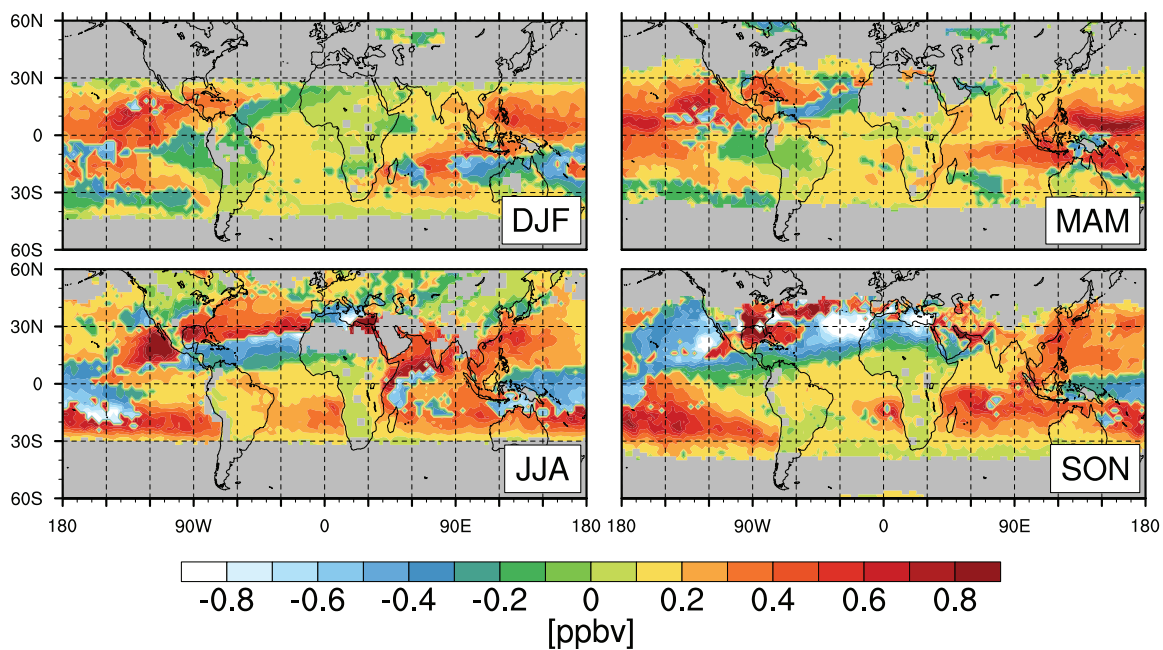

Figure S2a:  $d\Delta O_3/dCO$  for a simulation without combustion sources in each season of 2008. Gray indicates insufficient data (see text).

### Biogenic Source Influence 2008

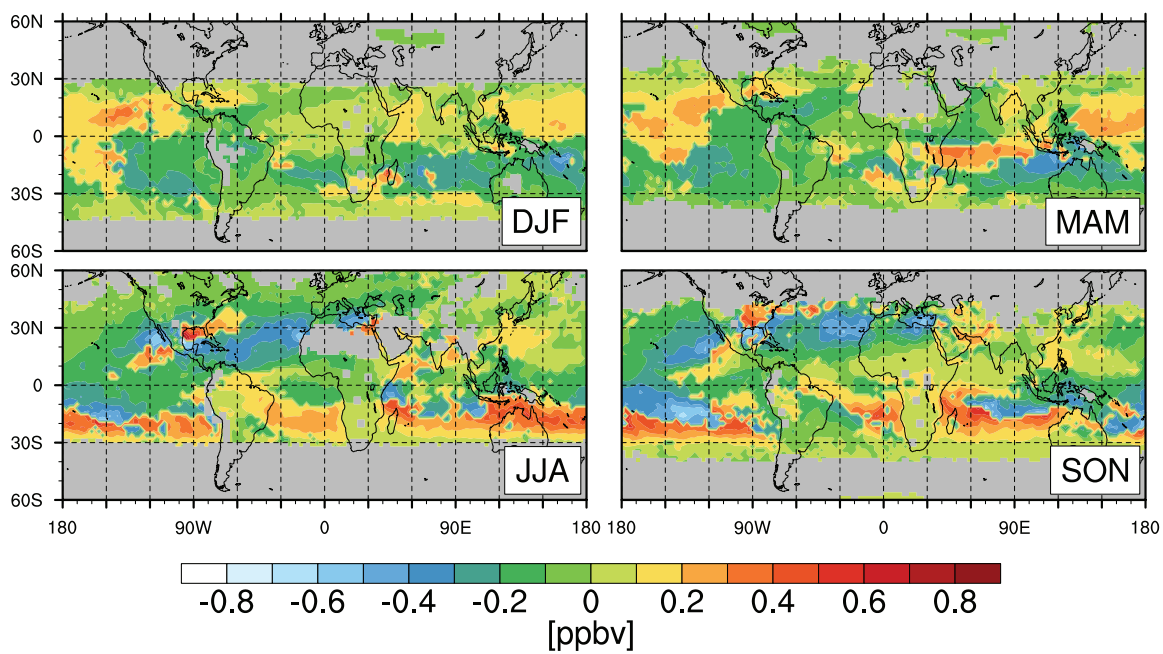

Figure S2b: Same as Figure S2a but for a simulation without biogenic sources.

### Stratospheric Influence 2008

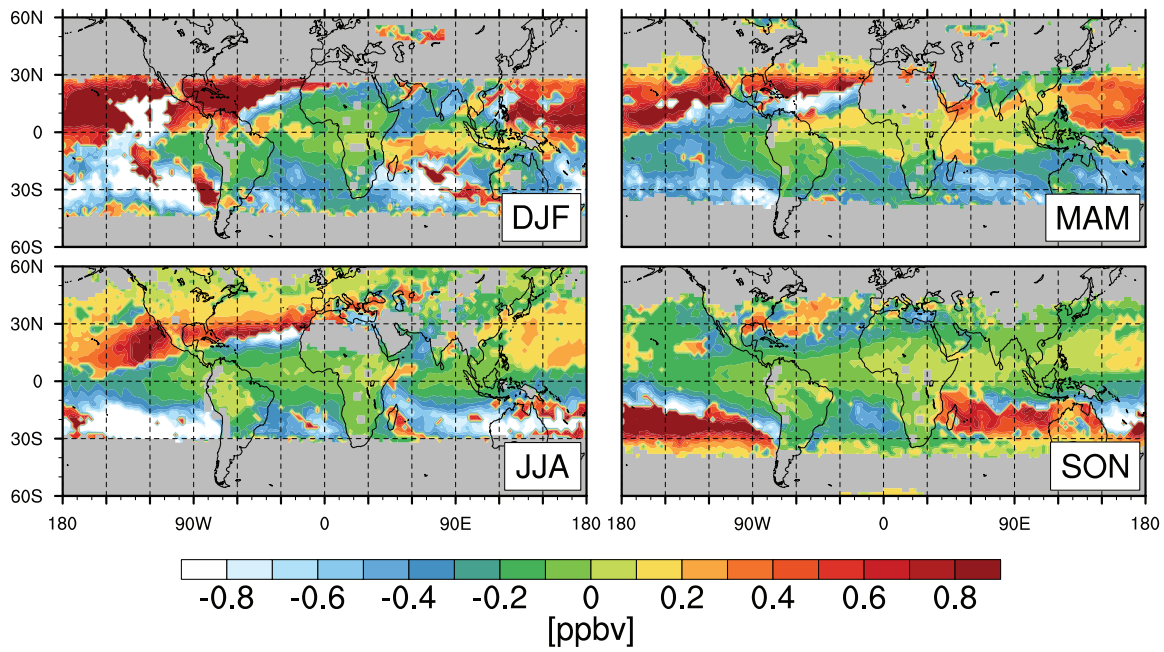

Figure S2c: Same as Figure S2a but for a simulation without stratospheric influence.

### Lightning NO<sub>x</sub> Emissions Influence 2008

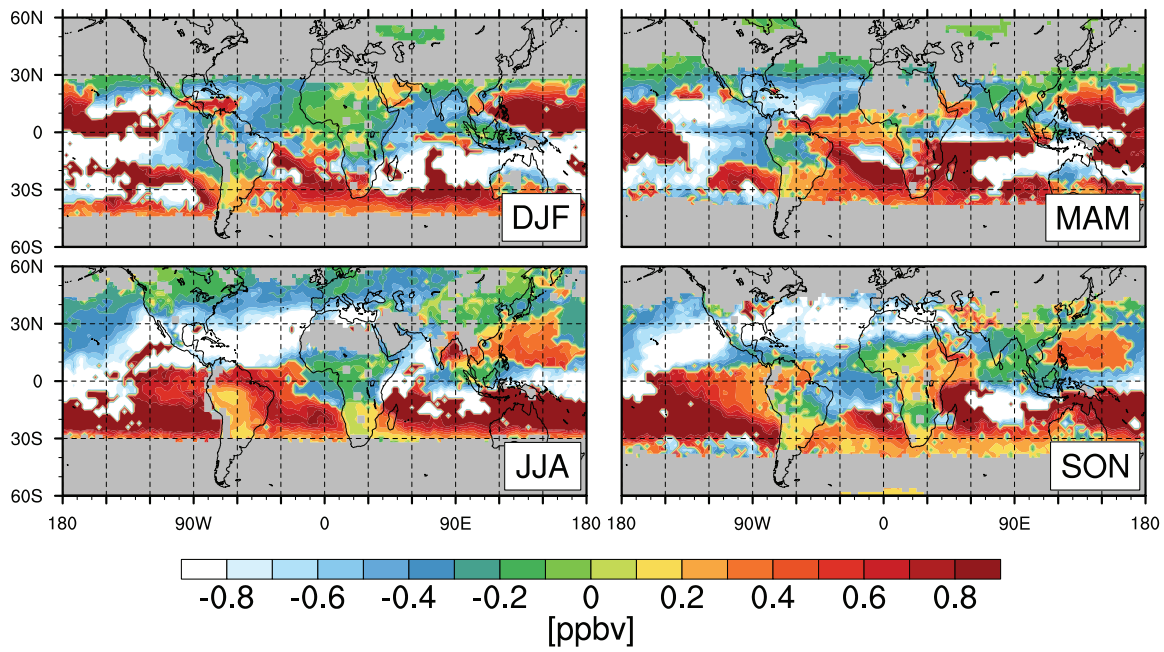

Figure S2d: Same as Figure S2a but for a simulation without lightning NO<sub>x</sub> emissions.

### Ozone from Combustion Sources

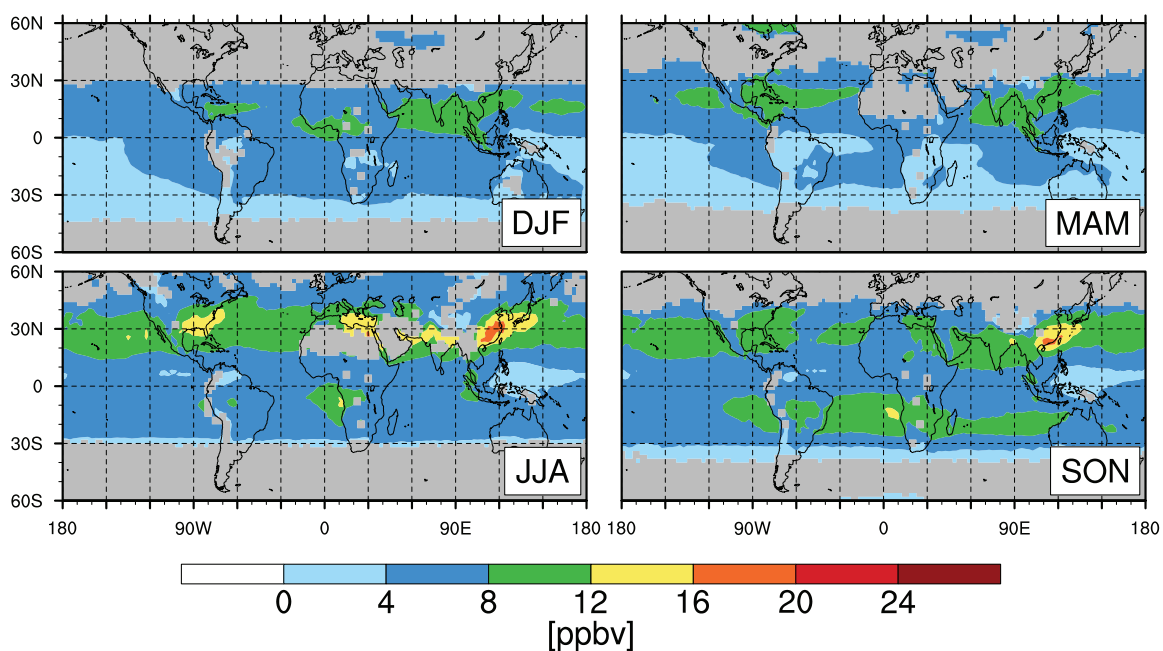

Figure S3a: Seasonal mean GEOS-Chem ozone mixing ratio enhancement from combustion sources at 700-400 hPa for 2008. The enhancement is the difference in ozone from the standard simulation and a simulation without combustion sources as in the right panel of Figure 5 ( $\Delta O_3$ ). Gray indicates insufficient data (see text).

### Ozone from Biogenic Sources

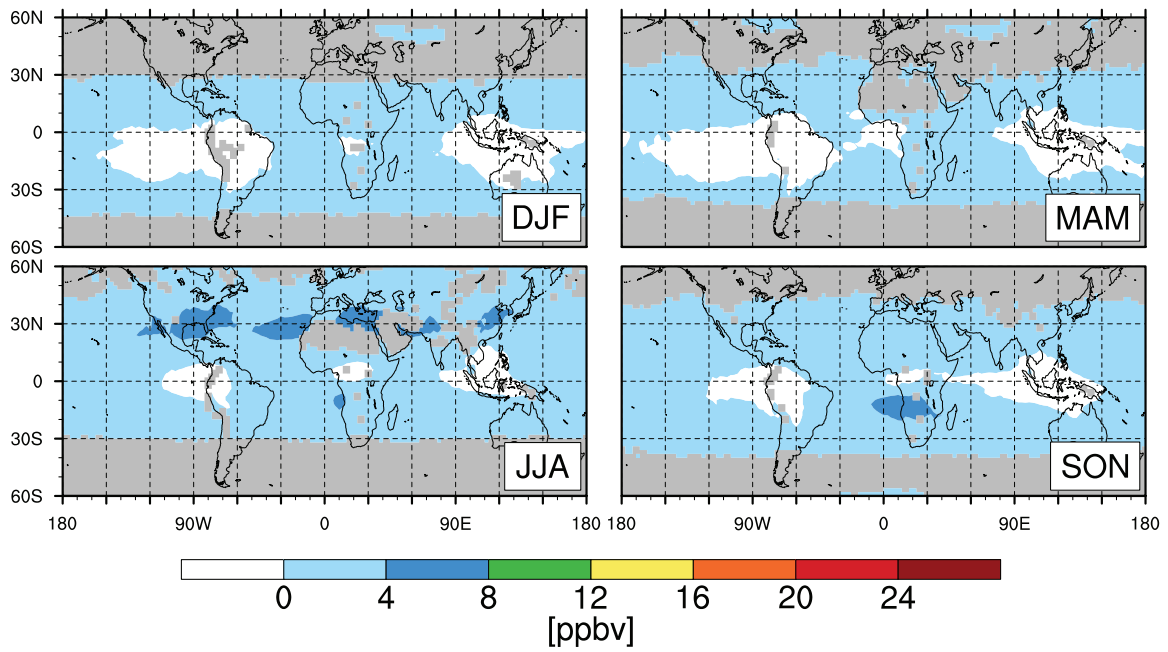

Figure S3b: Same as Figure S3a but for biogenic sources.



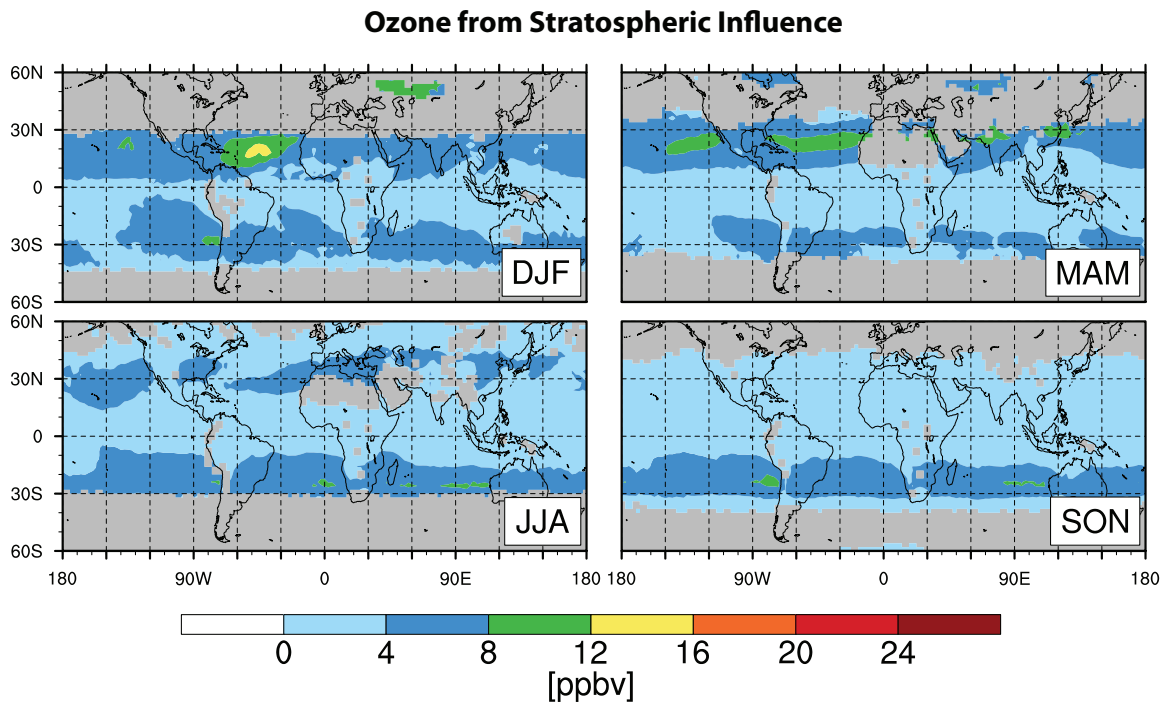

Figure S3c: Same as Figure S3a but for stratospheric influence.

### Ozone from Lightning Emissions

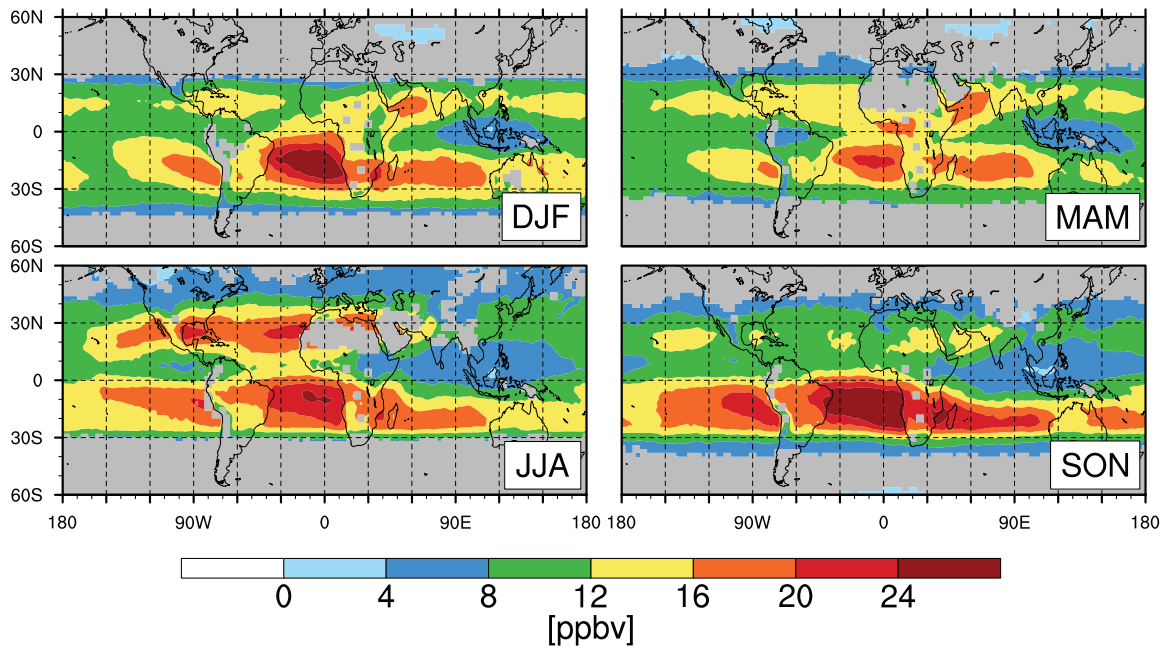

Figure S3d: Same as Figure S3a but for lightning  $\text{NO}_x$  emissions.

| Station            | DJF         | MAM         | JJA         | SON         |
|--------------------|-------------|-------------|-------------|-------------|
| Windhoek, Namibia  | 0.41 (0.47) | 0.21 (0.35) | 0.56 (0.31) | 0.76 (0.21) |
|                    | 0.35 (0.40) | 0.02 (0.60) | 0.49 (0.29) | 0.57 (0.46) |
|                    | n = 12      | n = 16      | n = 54      | n = 22      |
| Portland, USA      |             |             | 0.15 (0.38) |             |
|                    |             |             | 0.49 (0.30) |             |
|                    |             |             | n = 11      |             |
| Dallas, USA        |             |             | 0.46 (0.42) |             |
|                    |             |             | 0.03 (0.48) |             |
|                    |             |             | n = 25      |             |
| Atlanta, USA       |             |             | 0.33 (0.36) |             |
|                    |             |             | 0.84 (0.50) |             |
|                    |             |             | n = 10      |             |
| Philadelphia, USA  |             |             | 0.49 (0.32) |             |
|                    |             |             | 0.23 (0.36) |             |
|                    |             |             | n = 10      |             |
| London, UK         |             |             | 0.27 (0.35) |             |
|                    |             |             | 0.13 (0.57) |             |
|                    |             |             | n = 12      |             |
| Frankfurt, Germany |             |             | 0.39 (0.31) |             |
|                    |             |             | 0.27 (0.60) |             |
|                    |             |             | n = 27      |             |
| Vienna, Austria    |             |             | 0.54 (0.25) |             |
|                    |             |             | 0.49 (0.56) |             |
|                    |             |             | n = 28      |             |
| Tokyo, Japan       |             |             | 0.43 (0.58) |             |
|                    |             |             | 0.63 (0.62) |             |
|                    |             |             | n = 13      |             |
| Hyderabad, India   |             |             |             | 0.61 (0.35) |
|                    |             |             |             | 0.33 (0.37) |
|                    |             |             |             | n = 14      |

Table S1a: Ozone-CO correlations (and reduced major axis regression slopes in parentheses) from MOZAIC (green) and OMI/AIRS (yellow) at MOZAIC destination airports for each season of 2006. Also included below the statistics is the number of flights included in the analysis for each station and season (n). Gray indicates insufficient coincident data for statistical analysis (Section 2.5).

| Station            | DJF         | MAM         | JJA         | SON         |
|--------------------|-------------|-------------|-------------|-------------|
| Windhoek, Namibia  | 0.19 (0.53) | 0.20 (0.32) | 0.70 (0.20) | 0.28 (0.32) |
|                    | 0.20 (0.60) | 0.05 (0.49) | 0.61 (0.19) | 0.23 (0.36) |
|                    | n = 14      | n = 16      | n = 51      | n = 13      |
| Frankfurt, Germany |             |             | 0.40 (0.24) |             |
|                    |             |             | 0.69 (0.51) |             |
|                    |             |             | n = 19      |             |
| Hyderabad, India   |             |             |             | 0.09 (0.70) |
|                    |             |             |             | 0.20 (0.89) |
|                    |             |             |             | n = 10      |

Table S1b: Same as Table S1a but for each season of 2008.

|                                                   | a) North<br>Atlantic<br>JJA | b) South<br>Atlantic<br>DJF | c) East<br>Pacific<br>SON |
|---------------------------------------------------|-----------------------------|-----------------------------|---------------------------|
| AIRS CO                                           | 86.3                        | 98.9                        | 86.2                      |
| OMI ozone                                         | 59.9                        | 50.0                        | 50.5                      |
| GEOS-Chem standard CO                             | 81.5                        | 100.2                       | 80.3                      |
| GEOS-Chem standard ozone                          | 63.8                        | 52.6                        | 52.7                      |
| GEOS-Chem ozone without combustion sources        | 52.1                        | 45.3                        | 43.6                      |
| GEOS-Chem ozone without biogenic sources          | 59.9                        | 51.5                        | 50.3                      |
| GEOS-Chem ozone without stratospheric sources     | 58.4                        | 48.2                        | 50.0                      |
| GEOS-Chem ozone without lightning NO <sub>x</sub> | 49.6                        | 30.2                        | 42.1                      |

Table S2: 2008 seasonal mean AIRS CO and OMI ozone mixing ratios (ppb) and the corresponding GEOS-Chem values for all simulations for each region analyzed in Section 4.2 and shown in Figure 6.
